# Supplementary material for: A Tape-Wrapping Strategy towards Electrochemical Fabrication of Water-Dispersible Graphene
Source: MDPI journal article supplement (doi:10.3390/nano14090805), 2024-05-06
Supplement: s1 [file s1]

# A Tape-Wrapping Strategy towards Electrochemical Fabrication of Water-Dispersible Graphene

Deyue Xiao <sup>1,2</sup>, Peng He <sup>1,2,\*</sup>, Haolong Zheng <sup>1,2</sup>, Shujing Yang <sup>1,2</sup>, Siwei Yang <sup>1,2</sup> and Guqiao Ding <sup>1,2,\*</sup>

<sup>1</sup> National Key Laboratory of Materials for Integrated Circuits, Shanghai Institute of Microsystem and Information Technology, Chinese Academy of Sciences, 865 Changning Road, Shanghai 200050, China

<sup>2</sup> College of Materials Science and Opto-Electronic Technology, University of Chinese Academy of Sciences, Beijing 100049, China

\* Correspondence: hepeng@mail.sim.ac.cn (P.H.); gqding@mail.sim.ac.cn (G.D.)

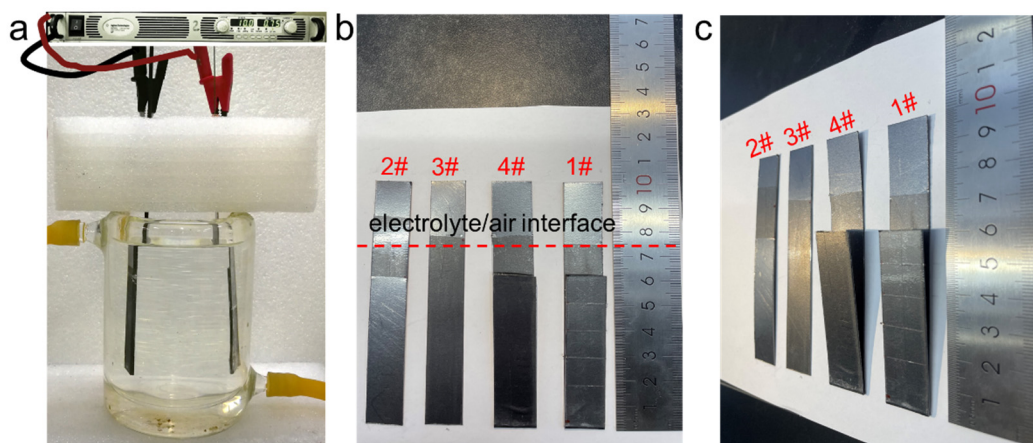

Figure S1. Photographs of electrochemical DC power source and reaction equipment (a), and the four anode configurations (b-c).

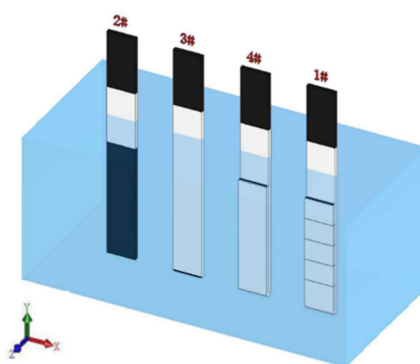

Figure S2. Three-dimensional model of the four anode configurations.

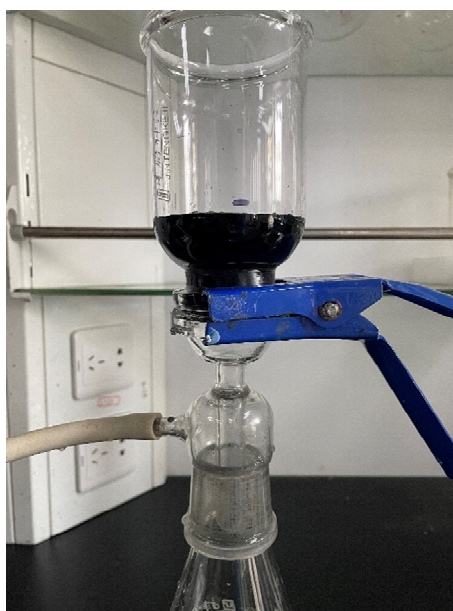

Figure S3. Photograph of vacuum filtration setup for preparing w-Gr films.

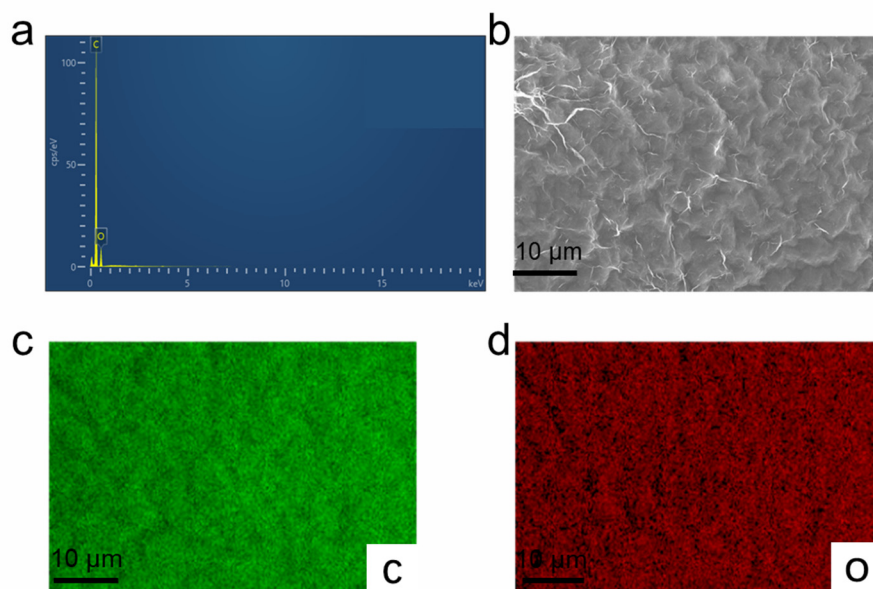

Figure S4. (a) EDX analysis of w-Gr. (b) SEM image, EDX mapping showing the C (c) and O (d) distribution on w-Gr surface.

Table S1. Elemental analysis of w-Gr based on the EDX results.

| Element | Content (wt.%) | Content (at.%) |
|---------|----------------|----------------|
| C       | 81.40          | 85.36          |
| O       | 18.60          | 14.64          |

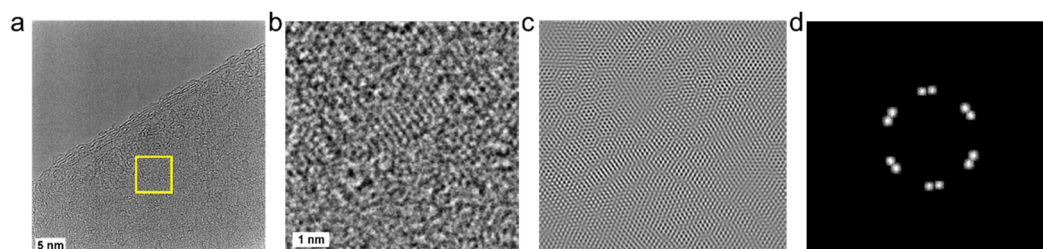

Figure S5. (a) Typical HR-TEM image of 1# w-Gr sheet (Scale bar: 5 nm). (b) HR-TEM image in the yellow rectangle (Scale bar: 1 nm). (c) Corresponding IFFT image and (d) FFT image in the yellow rectangle.

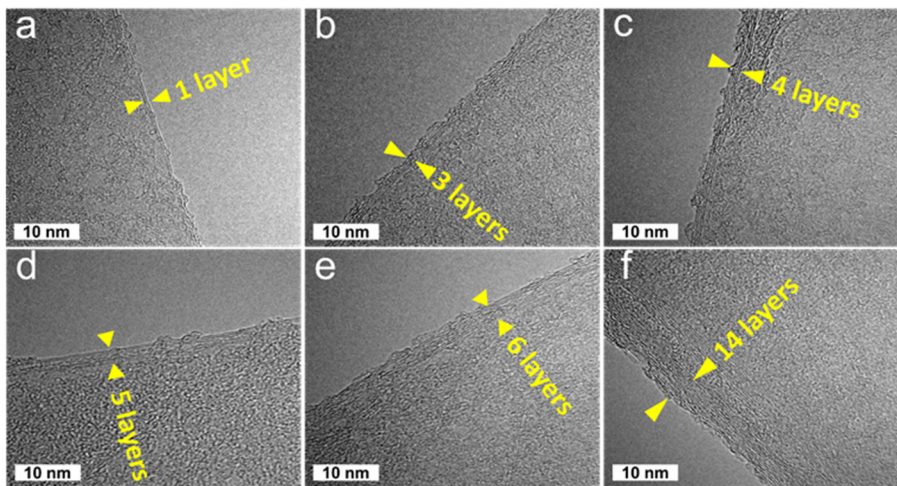

Figure S6. Typical HRTEM patterns of 1# w-Gr at folded edges with different atomic layer numbers. (Scale bars in a–f: 10 nm)

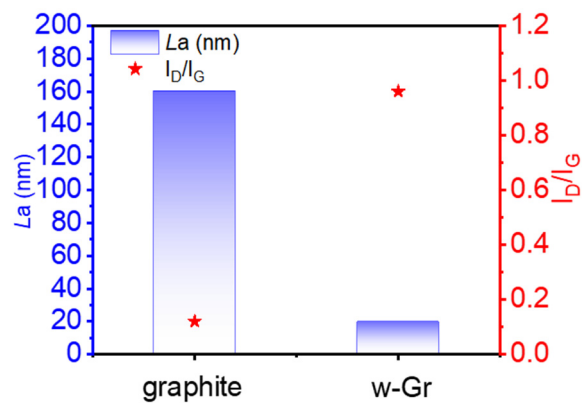

Figure S7. The comparison of structure parameters of graphite and w-Gr determined by Raman.

Table S2. The comparison of structure parameters of graphite and w-Gr determined by XRD.

| (002)              | Graphite | w-Gr   |
|--------------------|----------|--------|
| $2\theta$ (degree) | 26.97    | 25.54  |
| $d_{(002)}$ (nm)   | 0.3303   | 0.3486 |
| FWHM (degree)      | 0.41     | 4.95   |



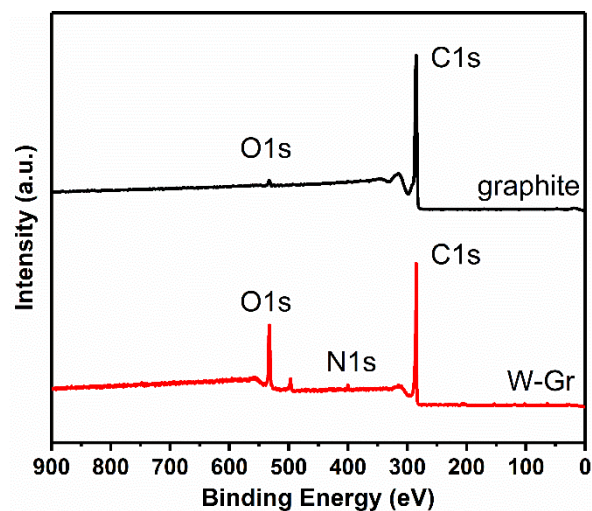

Figure S8. The XPS survey spectra of graphite and w-Gr.

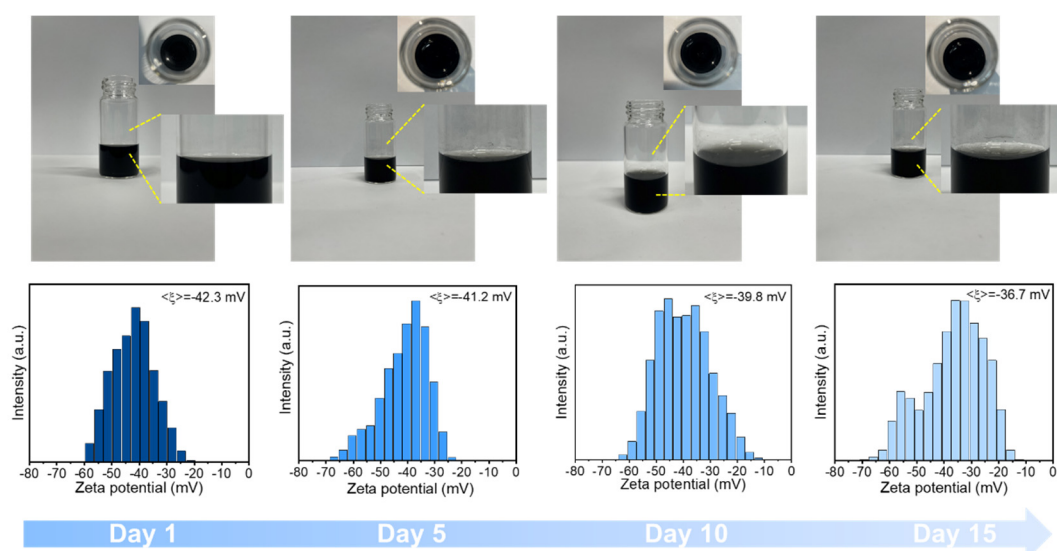

Figure S9. Photographs and zeta potentials of w-Gr dispersion taken every five days.

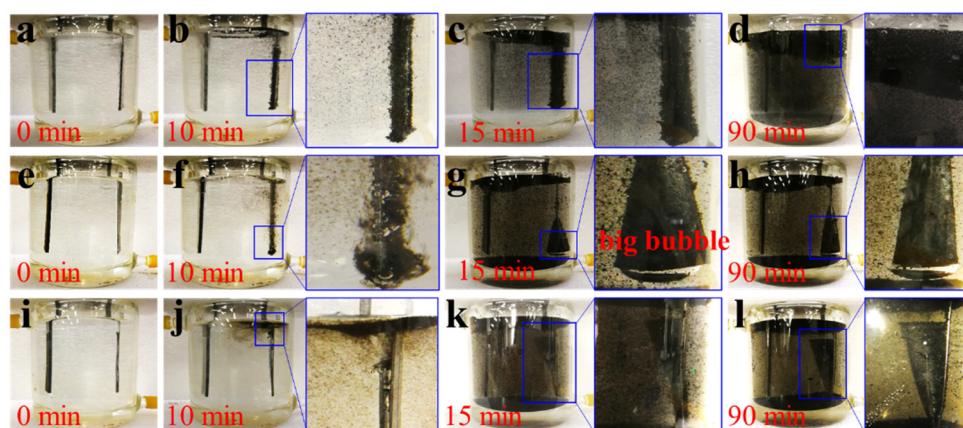

Figure S10. EC process of 2-4# anodes in 1 M  $(\text{NH}_4)_2\text{SO}_4$  (from top to the bottom). 0 minute (a, e, i), 10 minutes (b, f, j), 15 minutes (c, g, k), and 90 minutes (d, h, l).

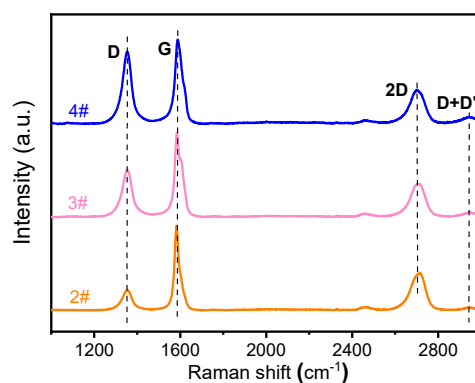

Figure S11. Raman spectra of w-products for 2-4# anodes.

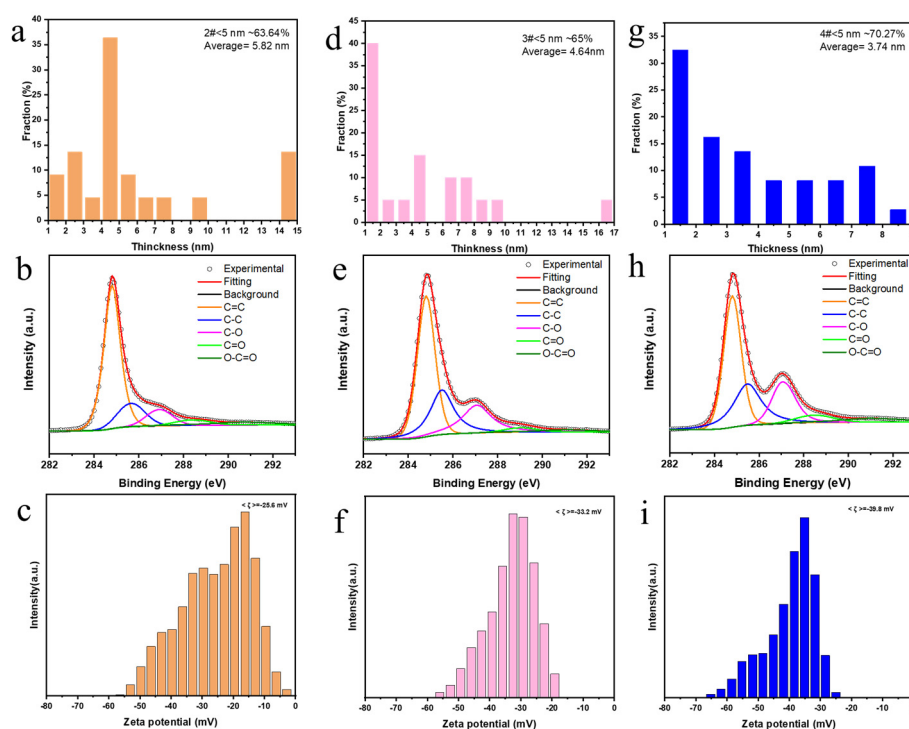

Figure S12. The thickness distribution (a, d, g), C1s XPS spectra (b, e, h), and zeta potential (c, f, i) of w-products for 2-4# anodes.

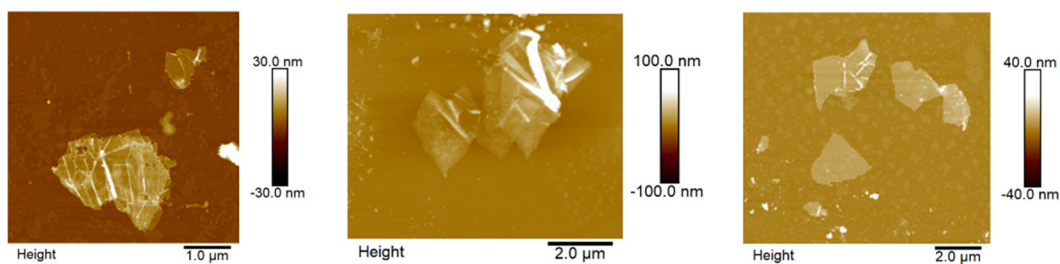

Figure S13. The typical AFM images of w-Gr prepared from 2-4# anodes.

Table S3 Calculation of the yield and production rate of w-Gr for 1-4# anodes.

| Sample | Zeta potential (mV) | Conductivity (mS/cm) |
|--------|---------------------|----------------------|
| 1#     | 42.2                | 0.00812              |
| 2#     | 25.6                | 0.0103               |
| 3#     | 33.2                | 0.0125               |
| 4#     | 39.8                | 0.00738              |

Table S4. Calculation of the yield and production rate of w-Gr for 1-4# anodes.

| NO. | Configuration of anode                                              | Electrochemical period (min) | Mass of product detached from the anode (g) | Mass of water-dispersible product (g) | Percentage of water-dispersible product (%) | Percentage of graphene in water-dispersible product (%) | Percentage of water-dispersible graphene in detached product (%) | Mass of water-dispersible graphene in one batch (mg) | Yield (%)<br>=M(w-Gr)/M(raw graphite) | Average time of anode exfoliation (min/g) | Production rate of water-dispersible graphene (mg/min) |
|-----|---------------------------------------------------------------------|------------------------------|---------------------------------------------|---------------------------------------|---------------------------------------------|---------------------------------------------------------|------------------------------------------------------------------|------------------------------------------------------|---------------------------------------|-------------------------------------------|--------------------------------------------------------|
| 1#  | side faces segregationally wrapped and folded with open end upwards | 90                           | 0.617                                       | 0.554                                 | 89.79                                       | 72.88                                                   | 65.44                                                            | 403.763                                              | 65.44                                 | 145.867                                   | 4.486                                                  |
| 2#  | side faces and end unwrapped                                        | 8                            | 0.639                                       | 0.102                                 | 15.96                                       | 63.64                                                   | 10.16                                                            | 64.913                                               | 10.52                                 | 12.520                                    | 8.114                                                  |
| 3#  | side faces wrapped with open end downwards                          | 70                           | 0.292                                       | 0.256                                 | 87.67                                       | 65.00                                                   | 56.99                                                            | 166.400                                              | 26.97                                 | 239.726                                   | 2.377                                                  |
| 4#  | Folded with side faces wrapped and end open upwards                 | 120                          | 0.118                                       | 0.0937                                | 79.41                                       | 70.27                                                   | 55.80                                                            | 65.843                                               | 10.67                                 | 1016.949                                  | 0.549                                                  |
